# Supplementary material for: Functional innovation promotes diversification of form in the evolution of an ultrafast trap-jaw mechanism in ants
Source: PubMed Central journal article supplement (PMC7924744; doi:10.1371/journal.pbio.3001031), 2021-03-02
Supplement: pbio.3001031.s012.pdf [file pbio.3001031.s012.pdf]

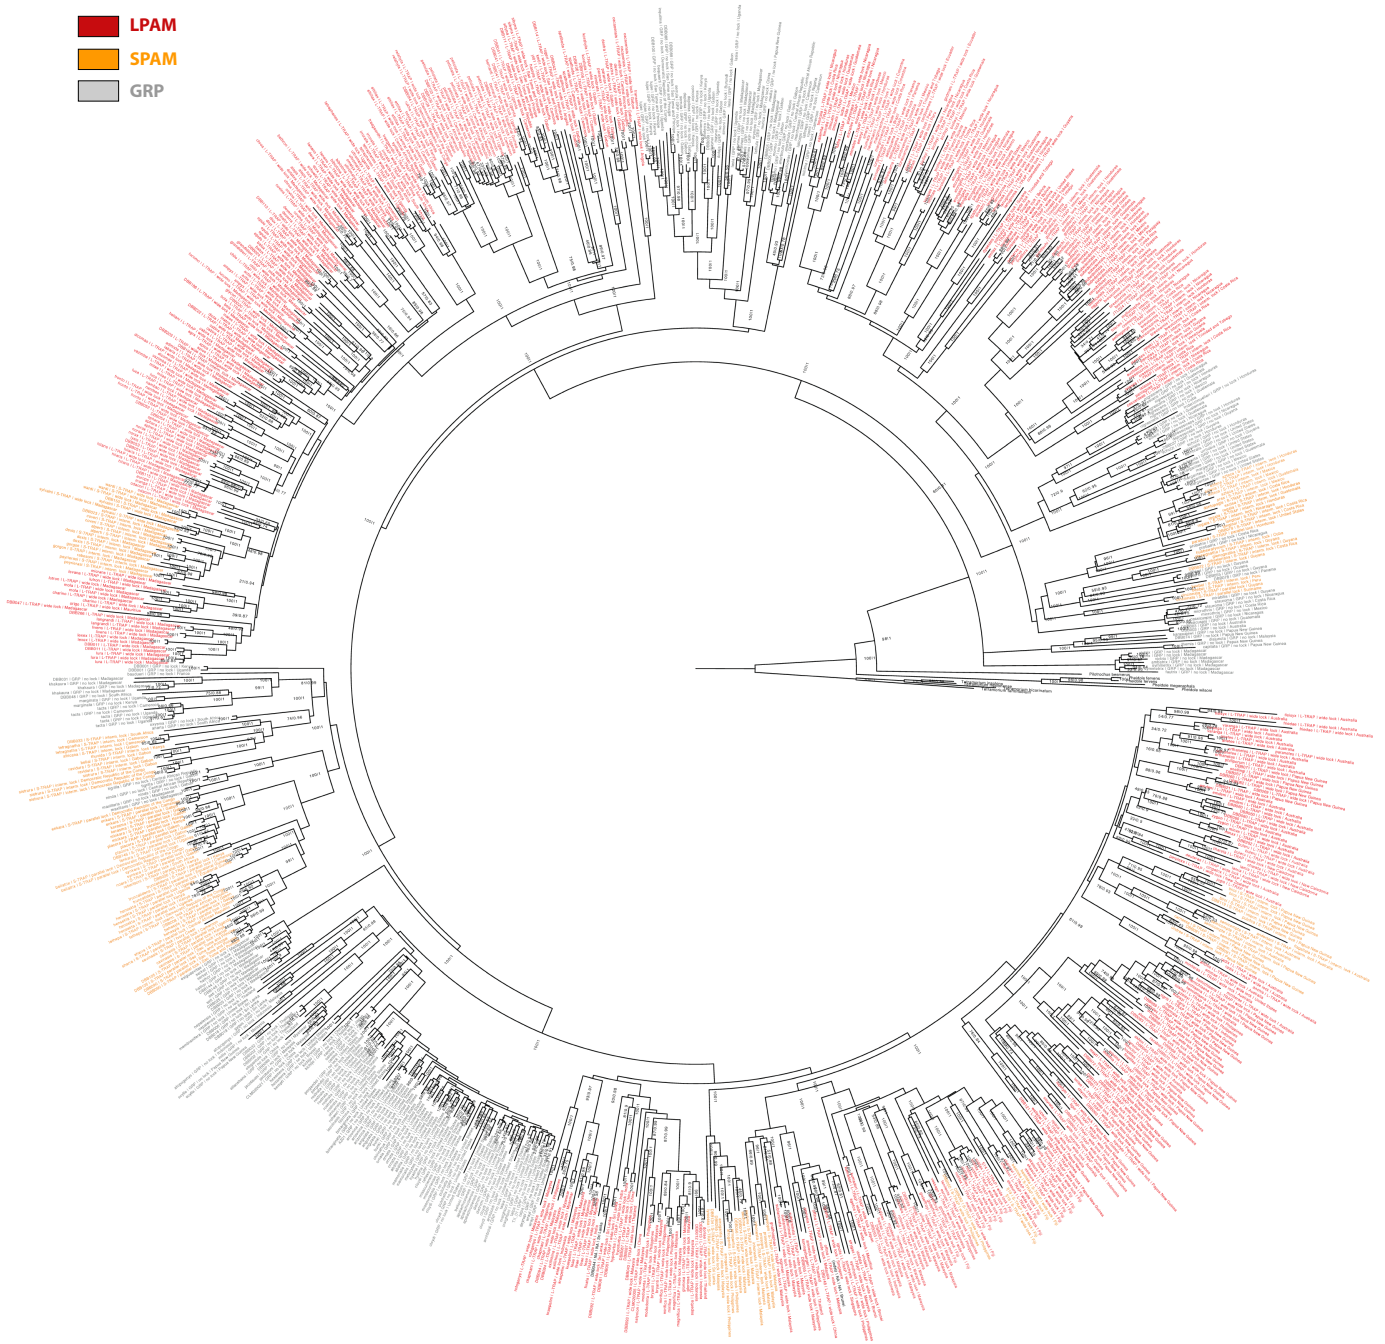

**Fig. S6. | The maximum likelihood tree for the full dataset (885 specimens) inferred with ExaML.** Nodes are annotated with bootstrap and booster scores based on 100 bootstraps.
