# Supplementary material for: Functional innovation promotes diversification of form in the evolution of an ultrafast trap-jaw mechanism in ants
Source: PubMed Central journal article supplement (PMC7924744; doi:10.1371/journal.pbio.3001031), 2021-03-02
Supplement: pbio.3001031.s013.pdf [file pbio.3001031.s013.pdf]

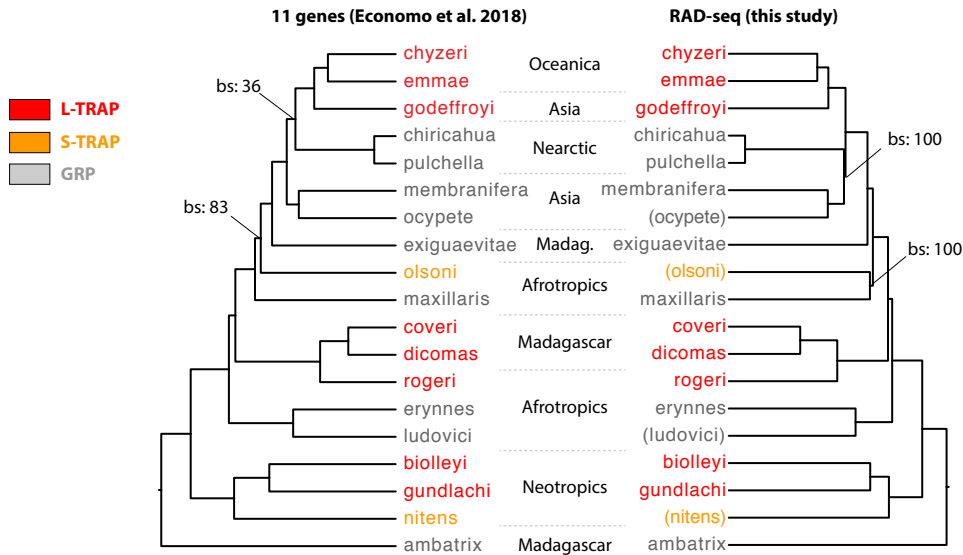

**Fig. S7. | Consistency of RAD-seq and gene-based phylogenies.** To check whether our RAD-seq based phylogeny was consistent with previous analyses, we compared the topology of subtrees of overlapping taxa between the current analysis (i.e. as seen in Fig. S4) and a previous analyses based on different molecular data (tree from a family wide diversification analysis in Economato et al. 2018, most of the data from Ward et al. 2015 which also inferred a nearly identical topology). In some cases, where the same species was not sequenced, a closely related species from the same species group was substituted for the comparison (*S. atopogenys* for *S. ocypete*, *S. sistrura* for *S. olsoni*, *S. simoni* for *S. ludovici*, *S. hubbewatyorum* for *S. nitens*), these are denoted with parentheses. Numbers indicate bootstrap support for nodes that disagreed between the two trees. Note the 11-gene phylogeny recovered the ambatrix group in the “root 1” position, sister to the rest of *Strumigenys* (although *capitata* group was not included).
