# Supplementary material for: Functional innovation promotes diversification of form in the evolution of an ultrafast trap-jaw mechanism in ants
Source: PubMed Central journal article supplement (PMC7924744; doi:10.1371/journal.pbio.3001031), 2021-03-02
Supplement: pbio.3001031.s015.pdf [file pbio.3001031.s015.pdf]

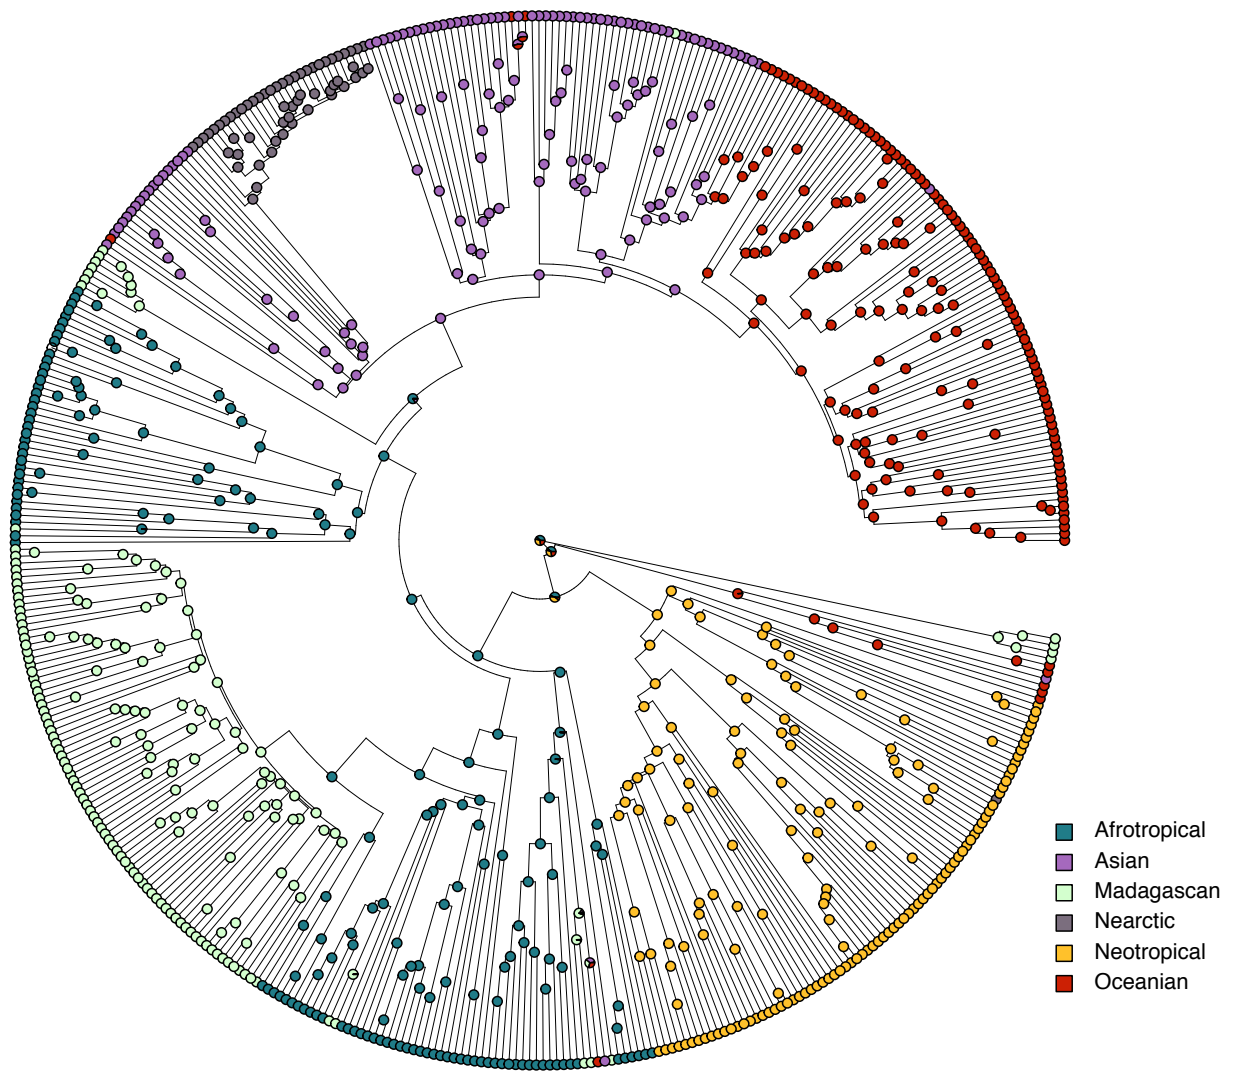

**Fig. S9. | Biogeographic history of *Strumigenys*.** Probabilities of ancestral states in each broad geographic region calculated with stochastic character mapping under a Maximum Likelihood model. The deepest nodes are uncertain, but the main clades within the genus are highly geographically structured.
